# Supplementary material for: Micro/nano-complex-structure SiOx–PANI–Ag composites with homogeneously-embedded Si nanocrystals and nanopores as high-performance anodes for lithium ion batteries
Source: Royal Society of Chemistry journal article supplement (doi:10.1039/c3ta14498d), 2013-12-09
Supplement: c3ta14498d.pdf [file c3ta14498d.pdf]

## Electronic Supplementary Information (ESI)

# Micro/Nano-Complex-Structure $\text{SiO}_x$ -PANI-Ag Composites with Homogeneously-Embedded Si Nanocrystals and Nanopores as High-Performance Anodes for Lithium Ion Batteries

Pinjie Zhang,<sup>a</sup> Lianbang Wang,<sup>a\*</sup> Jian Xie,<sup>a</sup> Liwei Su<sup>a\*</sup> and Chun-an Ma<sup>a</sup>

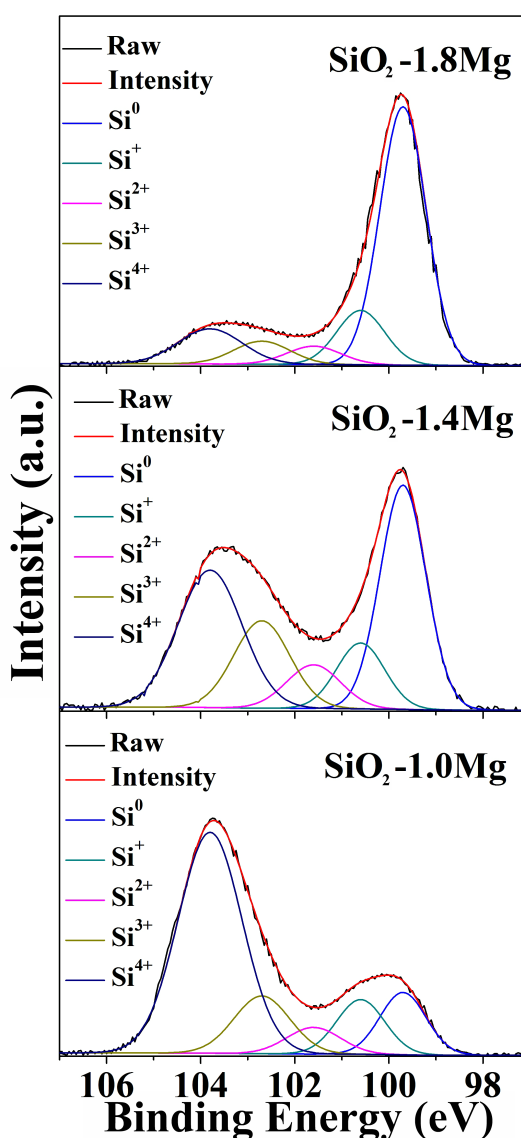

**Fig. S1** XPS Si2p for  $\text{SiO}_x$  microparticles from precursors with different  $\text{SiO}_2$ :Mg ratios.

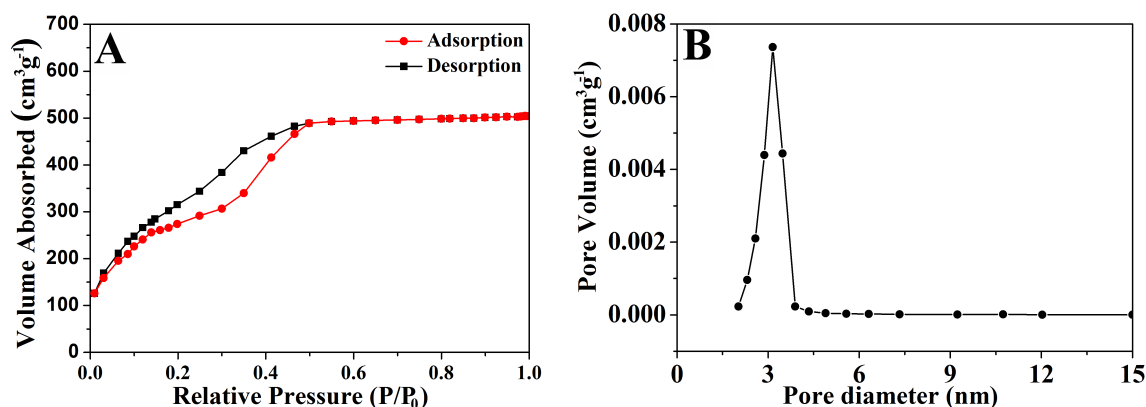

**Fig. S2** N<sub>2</sub> adsorption-desorption isotherms of nanoporous SiO<sub>x</sub>(SiO<sub>2</sub>-1.8Mg) (A) and the corresponding pore-size distribution plot (B).

**Table S1** Characterization of nanoporous structures for SiO<sub>x</sub> microparticles from precursors with different SiO<sub>2</sub>:Mg ratios.

| SiO <sub>x</sub> samples | Specific surface area (m <sup>2</sup> g <sup>-1</sup> ) | Specific pore volume (cm <sup>3</sup> g <sup>-1</sup> ) | Average pore diameter (nm) |
|--------------------------|---------------------------------------------------------|---------------------------------------------------------|----------------------------|
| SiO <sub>2</sub> -1.0Mg  | 1147.4                                                  | 0.71                                                    | 3.05                       |
| SiO <sub>2</sub> -1.4Mg  | 1142.9                                                  | 0.68                                                    | 3.01                       |
| SiO <sub>2</sub> -1.8Mg  | 1151.3                                                  | 0.74                                                    | 3.15                       |
| SiO <sub>2</sub> -2.2Mg  | 1145.7                                                  | 0.69                                                    | 3.04                       |

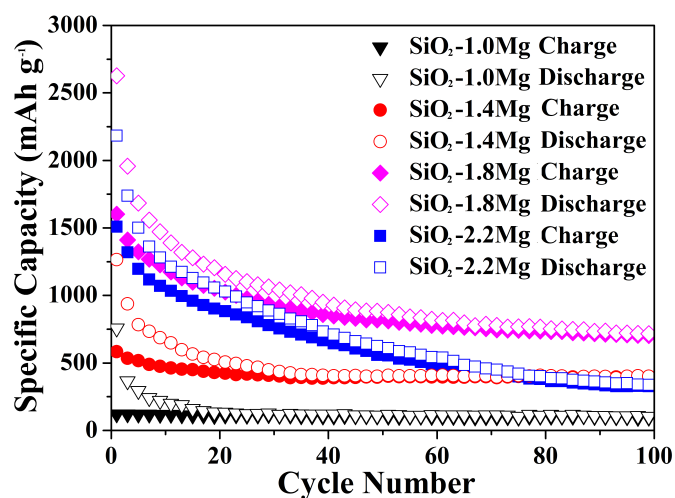

**Fig. S3** Cycling performances for nanoporous SiO<sub>x</sub> microparticles at 100 mA g<sup>-1</sup> between 0.01-2.0 V.

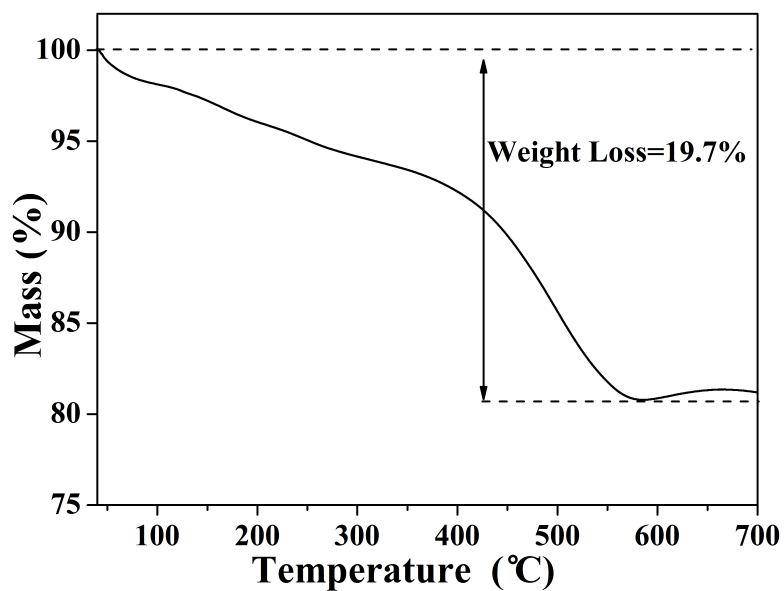

**Fig. S4** TGA curves of  $\text{SiO}_x$ -PANI-Ag composites in air at a heating rate  $5\text{ °C min}^{-1}$ .

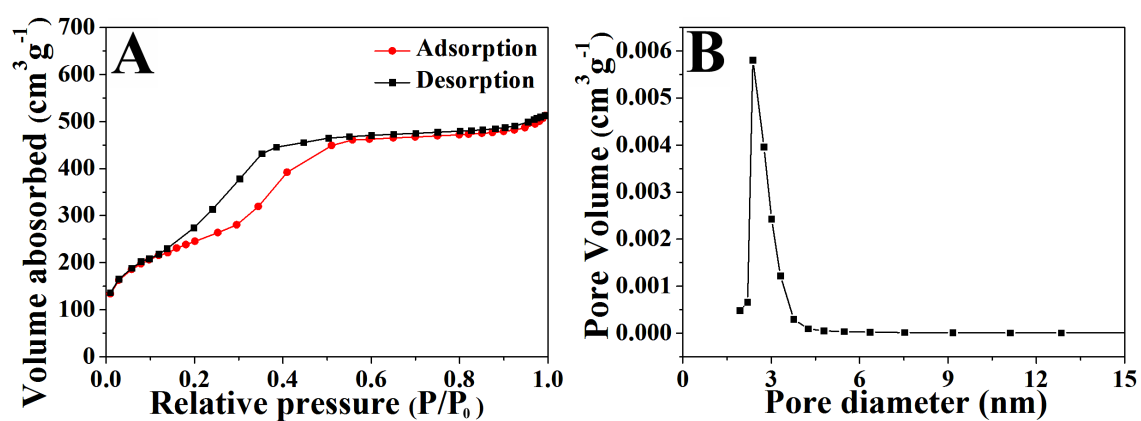

**Fig. S5**  $\text{N}_2$  adsorption-desorption isotherms of nanoporous  $\text{SiO}_x$ -PANI-Ag ( $\text{SiO}_2$ -1.8Mg) (A) and the corresponding pore-size distribution plot (B).

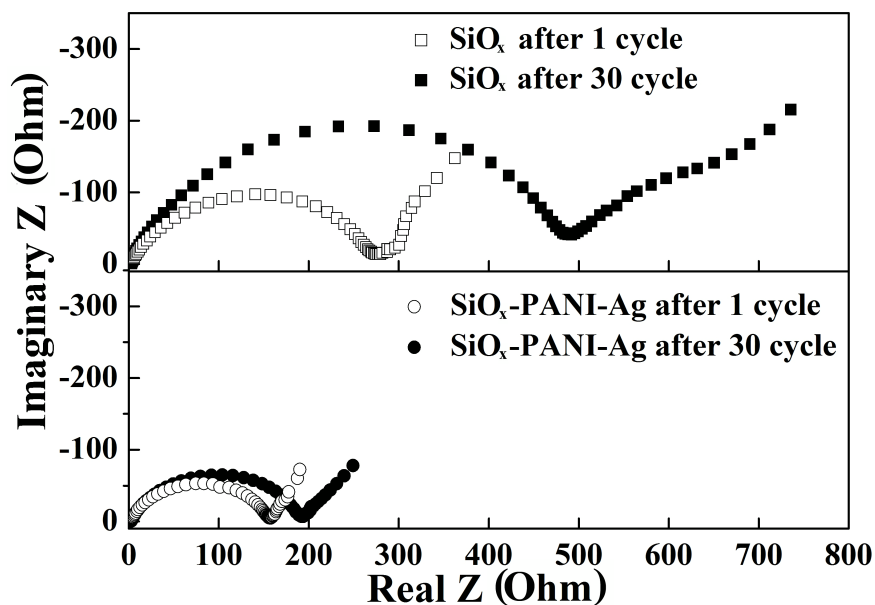

**Fig. S6** Nyquist plots for the EIS of nanoporous  $\text{SiO}_x$  and  $\text{SiO}_x$ -PANI-Ag composites at different states.

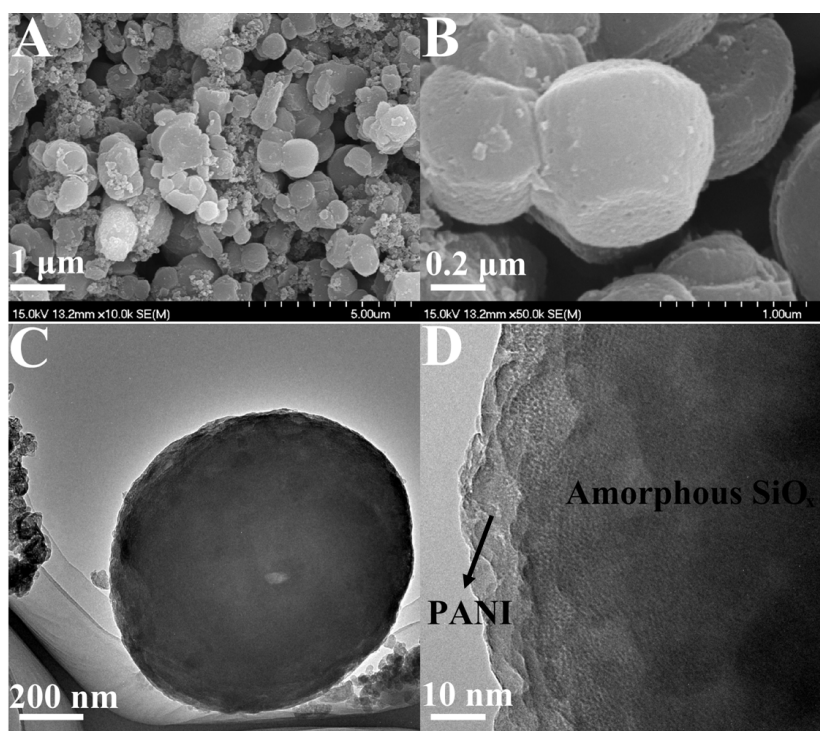

**Fig. S7** SEM (A, B) and TEM (C, D) images of  $\text{SiO}_x$ -PANI-Ag composites after 20 cycles.
